# Supplementary material for: The Toll pathway inhibits tissue growth and regulates cell fitness in an infection-dependent manner
Source: eLife journal article supplement (doi:10.7554/elife.39939), 2018-11-19
Supplement: supp [file elife_poa_e39939_Figure_2_figure_supplement_1.pdf › elife_poa_e39939_Figure_2_figure_supplement_1.pdf]

**A**

Set up crosses

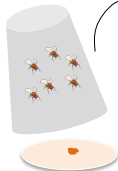

Egg collection

**A'**Dechoriation+  
10% bleach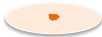**A''**

Wash + transfer

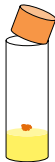**A'''**

Sterile 25°C incubator

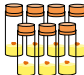**A''''****Antibiotics:**

Pen/Strep 1.7 ml in 100 ml

Ampicillin: 1/500

Kanamycin: 1/1000

Chloramphenicol: 1/1000

Antimycotic Nipagin\*: 0.15 g per 100 ml

**B'**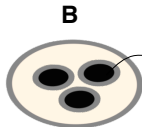*Aspergillus niger* plate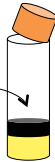Set up crosses,  
egg collection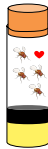**B''****Plates:**

Potato agar + ddH2O

Autoclave

Antibiotics

(Pen/Strep, Ampicillin, Kanamycin, Chloramphenicol)
