# Supplementary figures and images for: The Toll pathway inhibits tissue growth and regulates cell fitness in an infection-dependent manner
Source: eLife journal article supplement (doi:10.7554/elife.39939), 2018-11-19

*M<sup>-</sup> SalE>M<sup>+</sup>>Gal4*

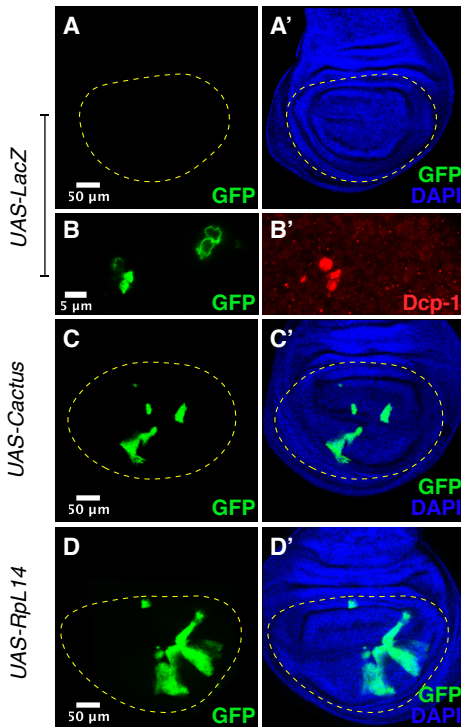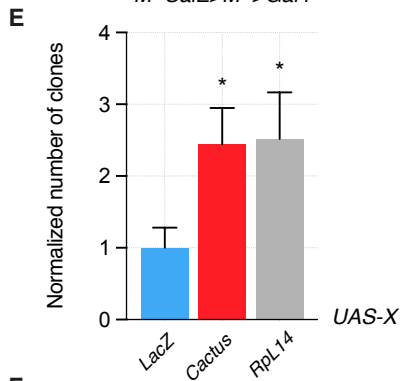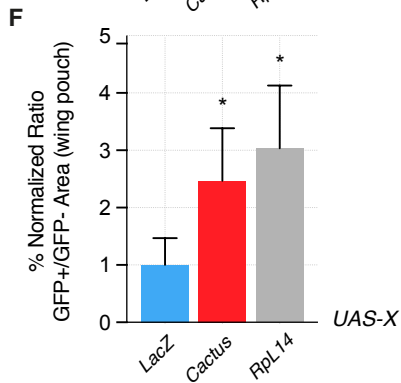

Supplement: supp [file elife_poa_e39939_Figure_1_figure_supplement_1.pdf › elife_poa_e39939_Figure_1_figure_supplement_1.pdf]

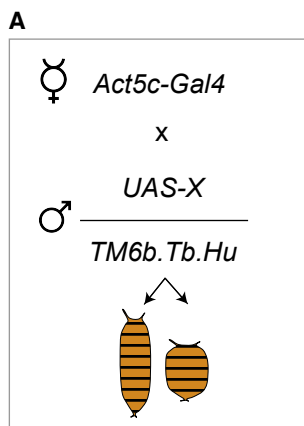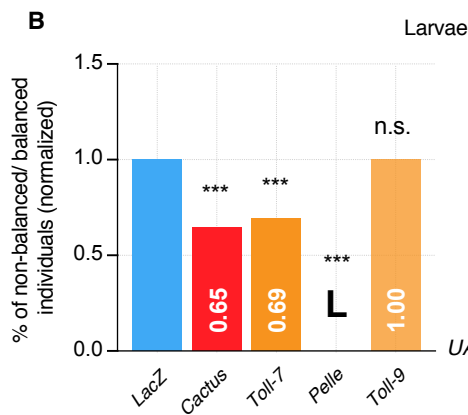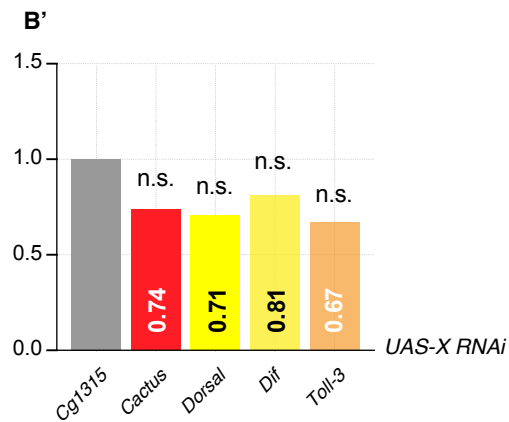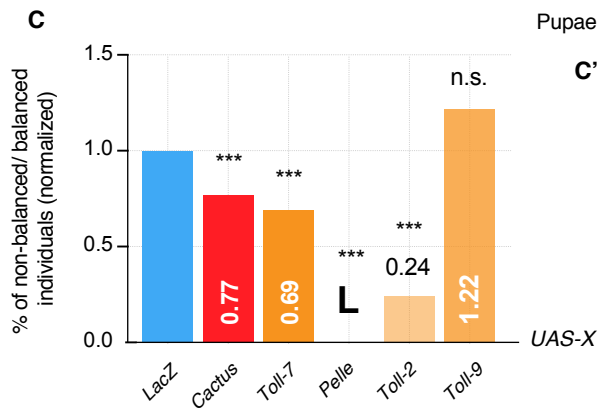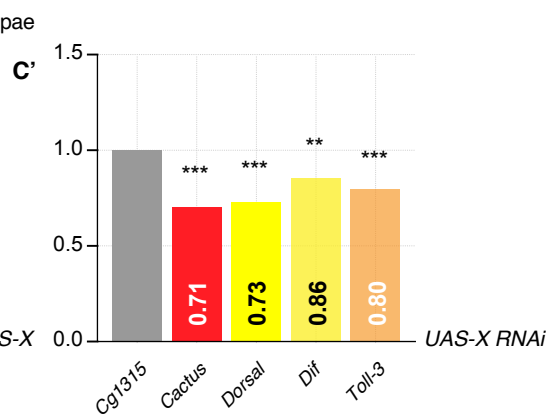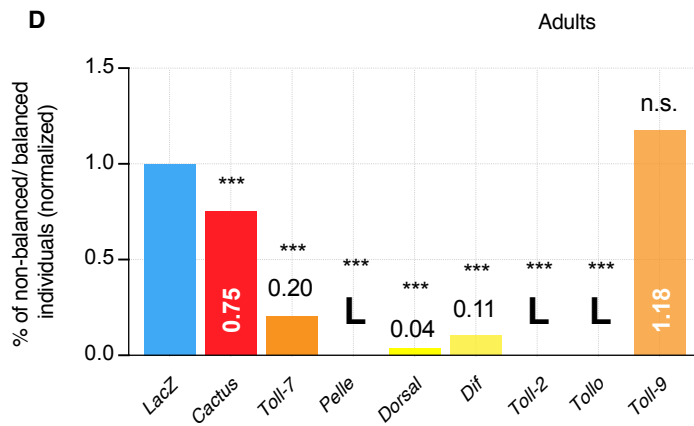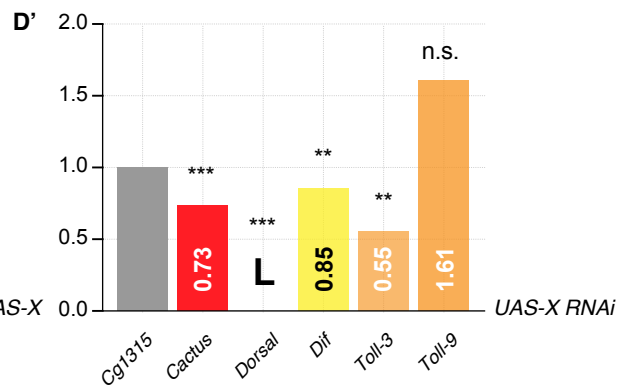

Supplement: supp [file elife_poa_e39939_Figure_1_figure_supplement_2.pdf › elife_poa_e39939_Figure_1_figure_supplement_2.pdf]

*hsp-Flp, Act>CD2>Gal4*

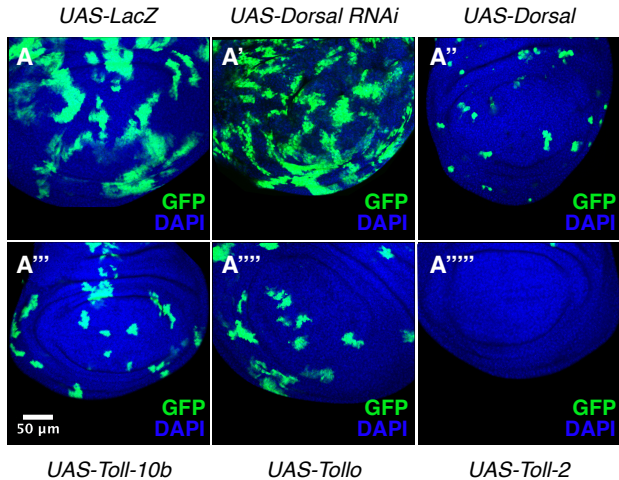

**B**

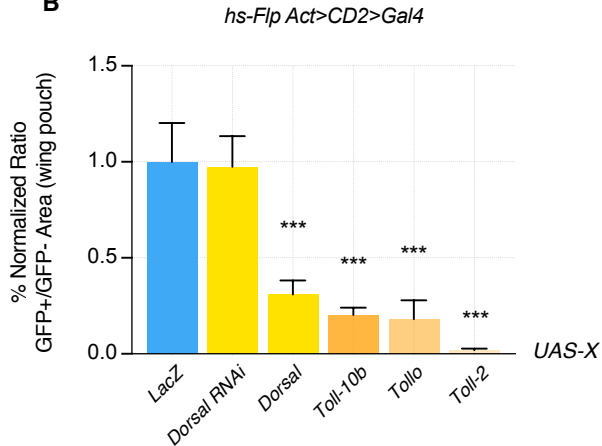

Supplement: supp [file elife_poa_e39939_Figure_1_figure_supplement_3.pdf › elife_poa_e39939_Figure_1_figure_supplement_3.pdf]

*hsp-Flp, Act>CD2>Gal4*

*UAS-Toll-7*

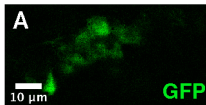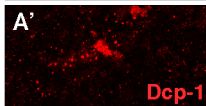

*UAS-Pelle*

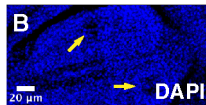

**C**

*UAS-Dorsal*

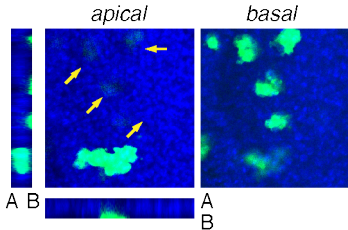

Supplement: supp [file elife_poa_e39939_Figure_1_figure_supplement_4.pdf › elife_poa_e39939_Figure_1_figure_supplement_4.pdf]

*en-Gal4, UAS-GFP*

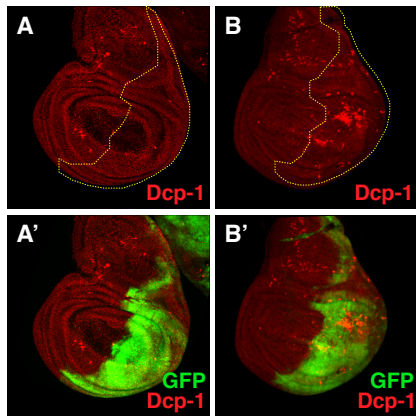

*UAS-Cactus*

*UAS-Toll-7*

**C**

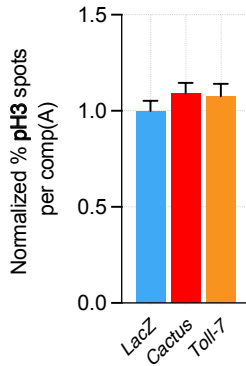

**D**

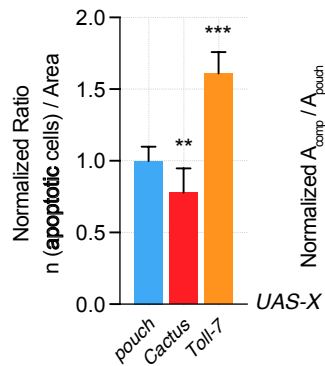

**E**

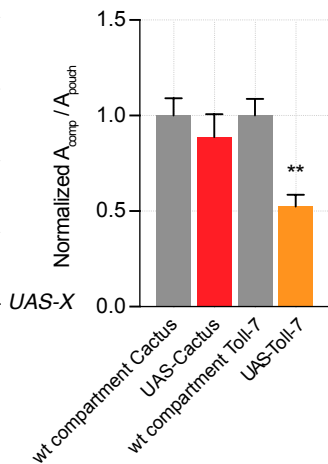

Supplement: supp [file elife_poa_e39939_Figure_1_figure_supplement_5.pdf › elife_poa_e39939_Figure_1_figure_supplement_5.pdf]

# Act5C-Gal4

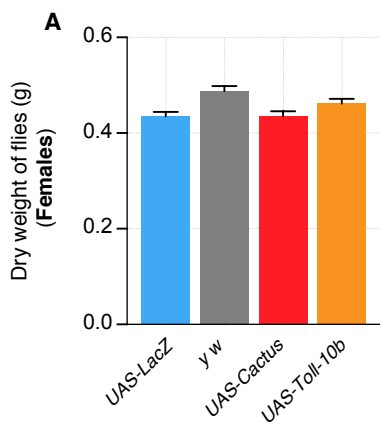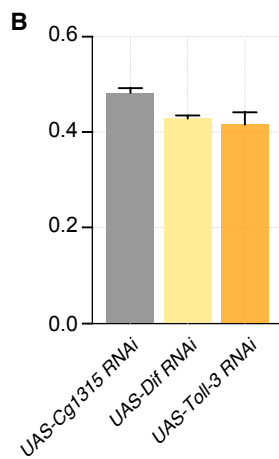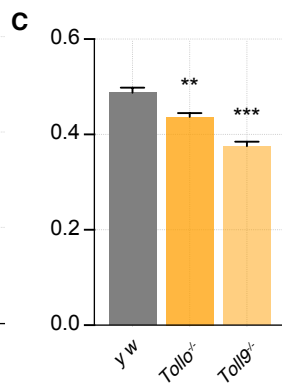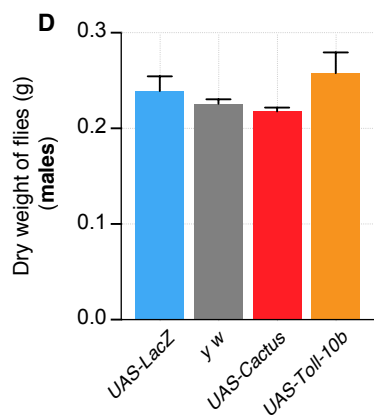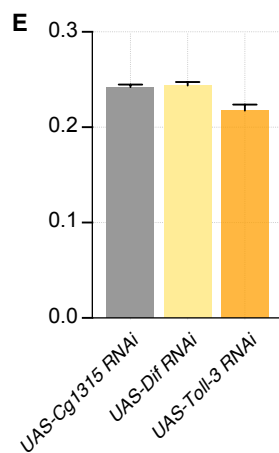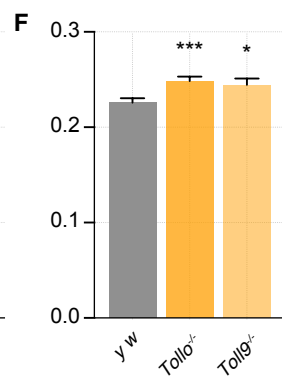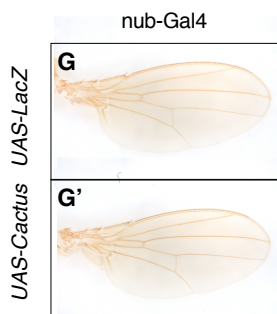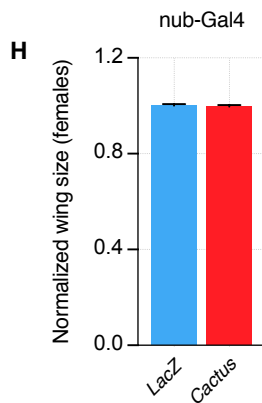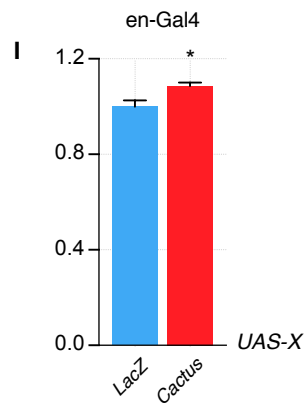

# ey-Flp Act>CD2>Gal4

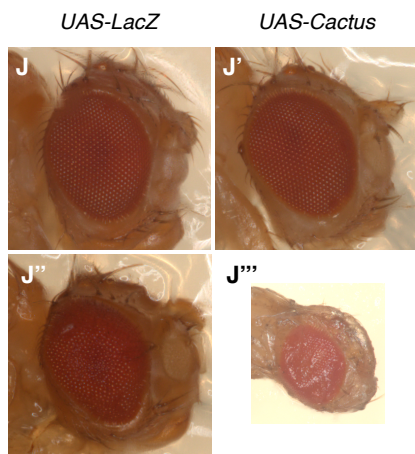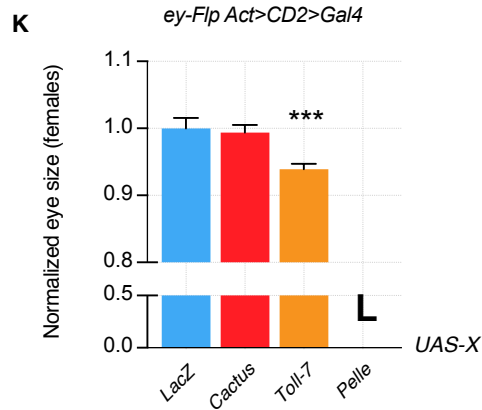

Supplement: supp [file elife_poa_e39939_Figure_1_figure_supplement_6.pdf › elife_poa_e39939_Figure_1_figure_supplement_6.pdf]

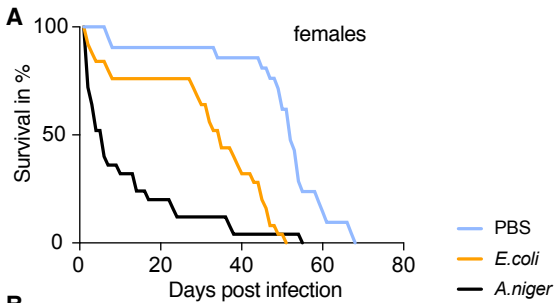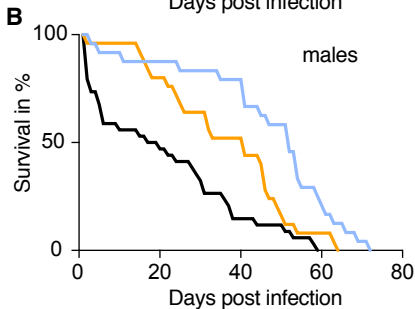

Supplement: supp [file elife_poa_e39939_Figure_2_figure_supplement_2.pdf › elife_poa_e39939_Figure_2_figure_supplement_2.pdf]

*Act5c-Gal4*

**Larvae A**

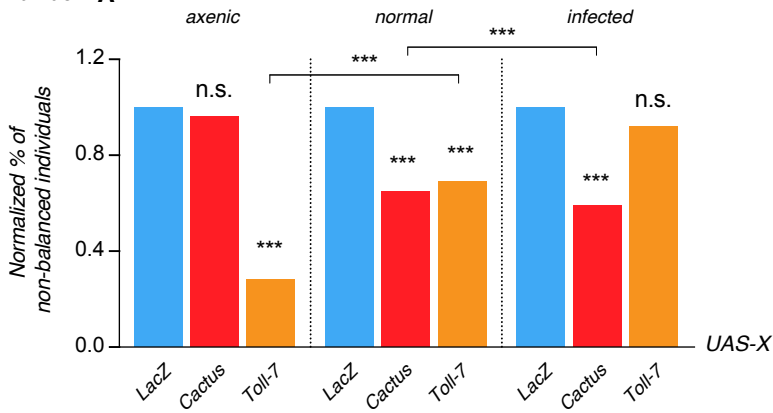

**A'**

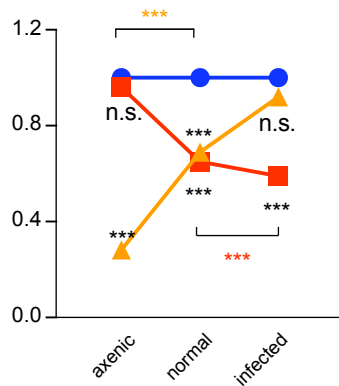

**Pupae B**

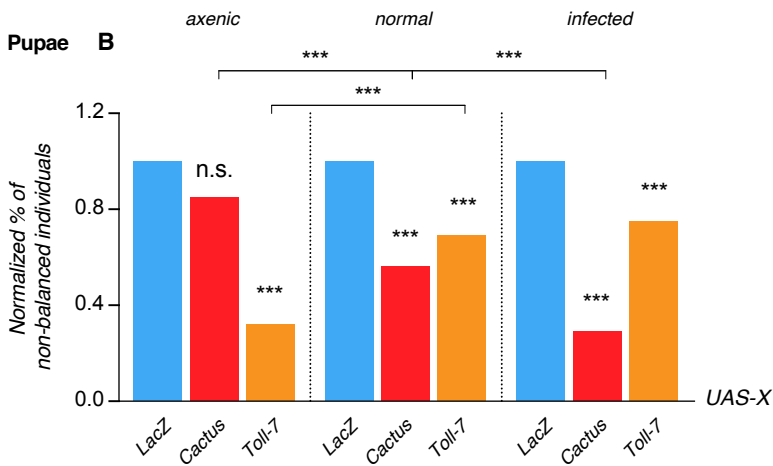

**B'**

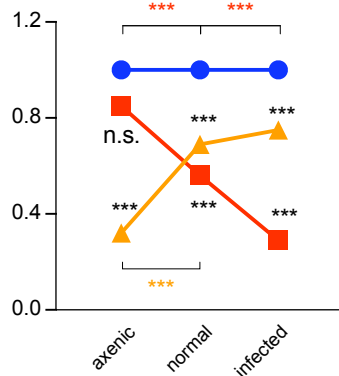

**Adults C**

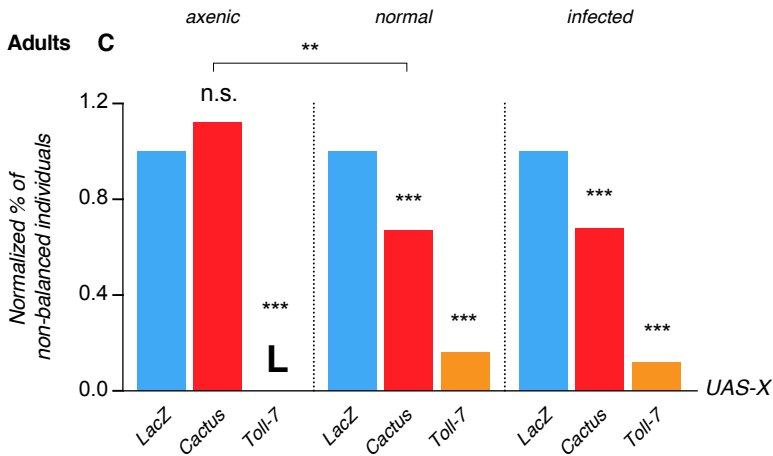

**C'**

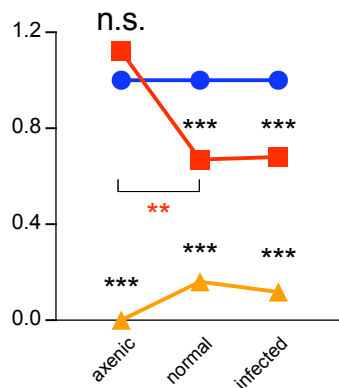

Supplement: supp [file elife_poa_e39939_Figure_3_figure_supplement_1.pdf › elife_poa_e39939_Figure_3_figure_supplement_1.pdf]

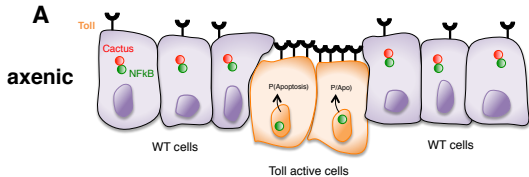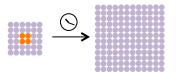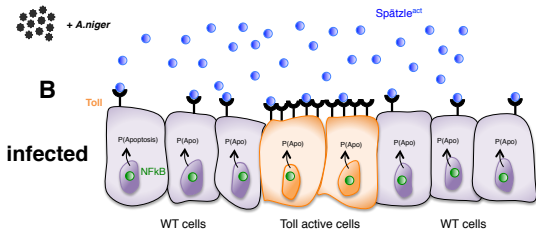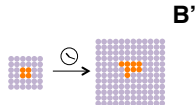

Supplement: supp [file elife_poa_e39939_Figure_4_figure_supplement_1.pdf › elife_poa_e39939_Figure_4_figure_supplement_1.pdf]
